# Supplementary material
Source: ML conference proceedings conference paper supplement (https://openaccess.thecvf.com/content/WACV_2020/html/Buizza_Real-Time_Multi-Person_Pose_WACV_2020_paper.html)
Supplement: Supplementary file 1 [file Buizza_Real-Time_Multi-Person_Pose_WACV_2020_supplemental.pdf]

Archive with 4 entries (4 files):
- 0660-supp.mp4
- __MACOSX/._0660-supp.mp4
- 0660-supp.pdf
- __MACOSX/._0660-supp.pdf
