# Supplementary material
Source: ML conference proceedings conference paper supplement (https://openaccess.thecvf.com/content/WACV_2020/html/Buizza_Real-Time_Multi-Person_Pose_WACV_2020_paper.html)
Supplement: Supplementary file 1 [file Buizza_Real-Time_Multi-Person_Pose_WACV_2020_supplemental.pdf › 0660-supp.pdf]

# Supplementary Material

## Real-Time Multi-Person Pose Tracking using Data Assimilation

Caterina Buizza                      Tobias Fischer                      Yiannis Demiris  
 Personal Robotics Laboratory, Dept. of Electrical and Electronic Engineering  
 Imperial College London

{caterina.buizzall, t.fischer, y.demiris}@imperial.ac.uk

### Length of Tracking Sequence

Here we report the results used to produce Fig. 3:

| Model                                   | MOTA Head | MOTA Shou | MOTA Elb | MOTA Wri | MOTA Hip | MOTA Knee | MOTA Ankl | MOTA Total | Speed FPS |
|-----------------------------------------|-----------|-----------|----------|----------|----------|-----------|-----------|------------|-----------|
| Original Algorithm                      |           |           |          |          |          |           |           |            |           |
| OP                                      | -77.9     | 6.2       | -26.4    | -53.8    | -10.1    | -34.3     | -62.3     | -39.7      | 25.5      |
| STAF                                    | 39.5      | 67.7      | 54.4     | 44.4     | 55.9     | 50.0      | 42.3      | 49.8       | 15.5      |
| LT                                      | 67.7      | 72.6      | 67.3     | 57.8     | 63.5     | 63.8      | 57.7      | 64.6       | 8.5       |
| Acceleration Model - Tracking 0 Frames  |           |           |          |          |          |           |           |            |           |
| OP                                      | 24.1      | 21.2      | 19.4     | 13.7     | 28.0     | 23.2      | 17.4      | 21.0       | 24.0      |
| STAF                                    | 35.5      | 59.4      | 53.7     | 39.8     | 57.3     | 43.1      | 46.6      | 47.8       | 14.0      |
| LT                                      | 63.2      | 64.7      | 63.4     | 57.3     | 54.6     | 57.9      | 59.1      | 60.0       | 7.5       |
| Acceleration Model - Tracking 2 Frames  |           |           |          |          |          |           |           |            |           |
| OP                                      | 23.7      | 21.4      | 18.7     | 16.4     | 27.0     | 21.9      | 21.2      | 21.4       | 37.0      |
| STAF                                    | 36.9      | 57.7      | 47.5     | 36.9     | 58.2     | 47.8      | 46.9      | 47.4       | 27.5      |
| LT                                      | 61.7      | 64.4      | 55.3     | 52.9     | 63.4     | 59.8      | 57.2      | 59.4       | 19.5      |
| Acceleration Model - Tracking 5 Frames  |           |           |          |          |          |           |           |            |           |
| OP                                      | 23.2      | 20.5      | 19.5     | 15.7     | 24.8     | 22.6      | 21.7      | 21.2       | 42.5      |
| STAF                                    | 34.6      | 55.8      | 46.1     | 35.9     | 56.2     | 46.6      | 46.0      | 45.8       | 36.5      |
| LT                                      | 56.9      | 57.7      | 57.5     | 56.9     | 58.2     | 57.8      | 56.9      | 57.4       | 25.0      |
| Acceleration Model - Tracking 10 Frames |           |           |          |          |          |           |           |            |           |
| OP                                      | 20.6      | 18.8      | 19.3     | 15.9     | 22.2     | 20.4      | 20.9      | 19.8       | 45.0      |
| STAF                                    | 35.6      | 51.9      | 43.2     | 32.7     | 54.0     | 44.4      | 47.0      | 44.1       | 41.0      |
| LT                                      | 52.5      | 54.4      | 49.6     | 48.1     | 53.7     | 51.4      | 48.7      | 51.3       | 33.5      |

Suppl. Table 1. PoseTrack2018 MOT metrics and average computing time in frames per second (FPS) with increasing number of tracking frames  $N$ .

### AlphaPose

We were unfortunately unable to replicate the reported results for AlphaPose. The authors report results on the PoseTrack 2018 dataset as well, but report MOTA only for PoseFlow (DeepMatch) and PoseFlow (OrbMatch), and AP results for AlphaPose. Reported speed for PoseFlow (DeepMatch) and PoseFlow (OrbMatch) are 8 FPS and 24 FPS respectively. There is no reported speed for AlphaPose, but on our systems, the algorithm took several hours to com-

plete a run on the validation dataset (160 video sequences of 70-150 frames).

We were able to produce results however using our module, as shown in Suppl. Table 2. The pattern is similar to what we found with the other methods, in that the acceleration model performed best in MOT (pose tracking) metrics. Interestingly, the constant velocity model performed significantly better than the velocity input model for the AP (pose estimation) metrics.

### Discussion of Performance Improvements

In the three image sequences in Suppl. Fig. 1, we see how our module improves each of the three methods used. The top and bottom rows of each pair show the unfiltered and filtered sequences respectively. From top to bottom we see results for LightTrack, STAF and OpenPose respectively.

LightTrack and STAF already perform their own tracking, and so we see that the ID of each identified person remains consistent (each ID has a consistent colour). However, both methods are still prone to losing keypoints from frame to frame. If the number of identified keypoints for a particular ID is below a certain threshold, this skeleton is not shown. Since the tracking module allows some of these missed joints to be filled in with predictions from the Kalman filter, we see that we manage to maintain the skeletons throughout the sequence. In addition, if a joint suddenly switches position quite significantly (*e.g.* when keypoints are switched between skeletons), the weighting from the Kalman filter keeps the keypoint close to where it was in previous frames. This helps solve issues such as inversion of keypoints between left and right sides or between skeletons.

The proposed module solves an additional issue for OpenPose, which as we see in Suppl. Fig. 1 actually identifies all the people in view. In this instance, the issue is one of continuously changing IDs between frames. This is partially resolved by the ID matching, but also because the Kalman filtering maintains more complete skeletons throughout the image sequence, facilitating the matching between skeletons of successive frames.

| Model                      | MOTA Head | MOTA Shou | MOTA Elb | MOTA Wri | MOTA Hip | MOTA Knee | MOTA Ankl | MOTA Total | MOTP Total | Prec Total | Rec Total | AP Head | AP Shou | AP Elb | AP Wri | AP Hip | AP Knee | AP Ankl | AP Total |
|----------------------------|-----------|-----------|----------|----------|----------|-----------|-----------|------------|------------|------------|-----------|---------|---------|--------|--------|--------|---------|---------|----------|
| Original Algorithm         |           |           |          |          |          |           |           |            |            |            |           |         |         |        |        |        |         |         |          |
| AlphaPose Train            | -121.5    | -104.9    | -141.0   | -150.1   | -119.1   | -133.9    | -154.6    | -131.4     | 40.0       | 10.4       | 15.7      | 2.0     | 3.5     | 2.1    | 1.5    | 3.4    | 2.7     | 2.2     | 2.4      |
| AlphaPose Val              | -119.3    | -94.4     | -122.8   | -134.2   | -101.9   | -117.8    | -138.1    | -118.4     | 44.8       | 16.3       | 24.6      | 3.9     | 8.4     | 6.6    | 5.1    | 7.9    | 6.8     | 5.7     | 6.2      |
| AlphaPose* Test            | -         | -         | -        | -        | -        | -         | -         | -          | -          | -          | -         | 66.7    | 73.3    | 68.3   | 61.1   | 67.5   | 67.0    | 61.3    | 66.5     |
| PoseFlow (DeepMatch)* Test | 59.8      | 67.0      | 59.8     | 51.6     | 60.0     | 58.4      | 50.5      | 58.3       | 67.8       | -          | -         | -       | -       | -      | -      | -      | -       | -       | -        |
| PoseFlow (OrbMatch)* Test  | 59.0      | 66.8      | 60.0     | 51.8     | 59.4     | 58.4      | 50.3      | 58.0       | 62.2       | -          | -         | -       | -       | -      | -      | -      | -       | -       | -        |
| Simple Linear Model        |           |           |          |          |          |           |           |            |            |            |           |         |         |        |        |        |         |         |          |
| AlphaPose                  | -1.2      | 0.3       | -13.9    | -17.8    | -6.4     | -7.4      | -10.4     | -7.1       | 38.5       | 6.4        | 6.3       | 19.4    | 31.1    | 23.7   | 17.6   | 23.7   | 19.8    | 16.0    | 21.5     |
| Velocity Input Model       |           |           |          |          |          |           |           |            |            |            |           |         |         |        |        |        |         |         |          |
| AlphaPose                  | 21.7      | 49.2      | 36.9     | 29.8     | 40.2     | 29.4      | 17.5      | 31.4       | 53.3       | 68.1       | 64.3      | 26.1    | 56.7    | 47.8   | 40.7   | 51.8   | 46.4    | 31.2    | 41.8     |
| Constant Velocity Model    |           |           |          |          |          |           |           |            |            |            |           |         |         |        |        |        |         |         |          |
| AlphaPose                  | 18.0      | 38.1      | 24.6     | 13.4     | 30.5     | 14.7      | 9.7       | 21.1       | 45.7       | 60.2       | 57.9      | 28.5    | 51.7    | 39.3   | 26.4   | 47.6   | 39.4    | 32.0    | 37.2     |
| Acceleration Model         |           |           |          |          |          |           |           |            |            |            |           |         |         |        |        |        |         |         |          |
| AlphaPose                  | 25.9      | 53.3      | 34.4     | 23.7     | 45.0     | 28.0      | 25.0      | 33.1       | 59.3       | 63.6       | 54.1      | 30.9    | 51.6    | 35.7   | 25.8   | 41.2   | 35.7    | 30.1    | 35.5     |

Suppl. Table 2. PoseTrack2018 MOT and AP metrics (tracking 0 frames) for four different Kalman filter models for AlphaPose. \* Reported results - NB we were unable to replicate these results.

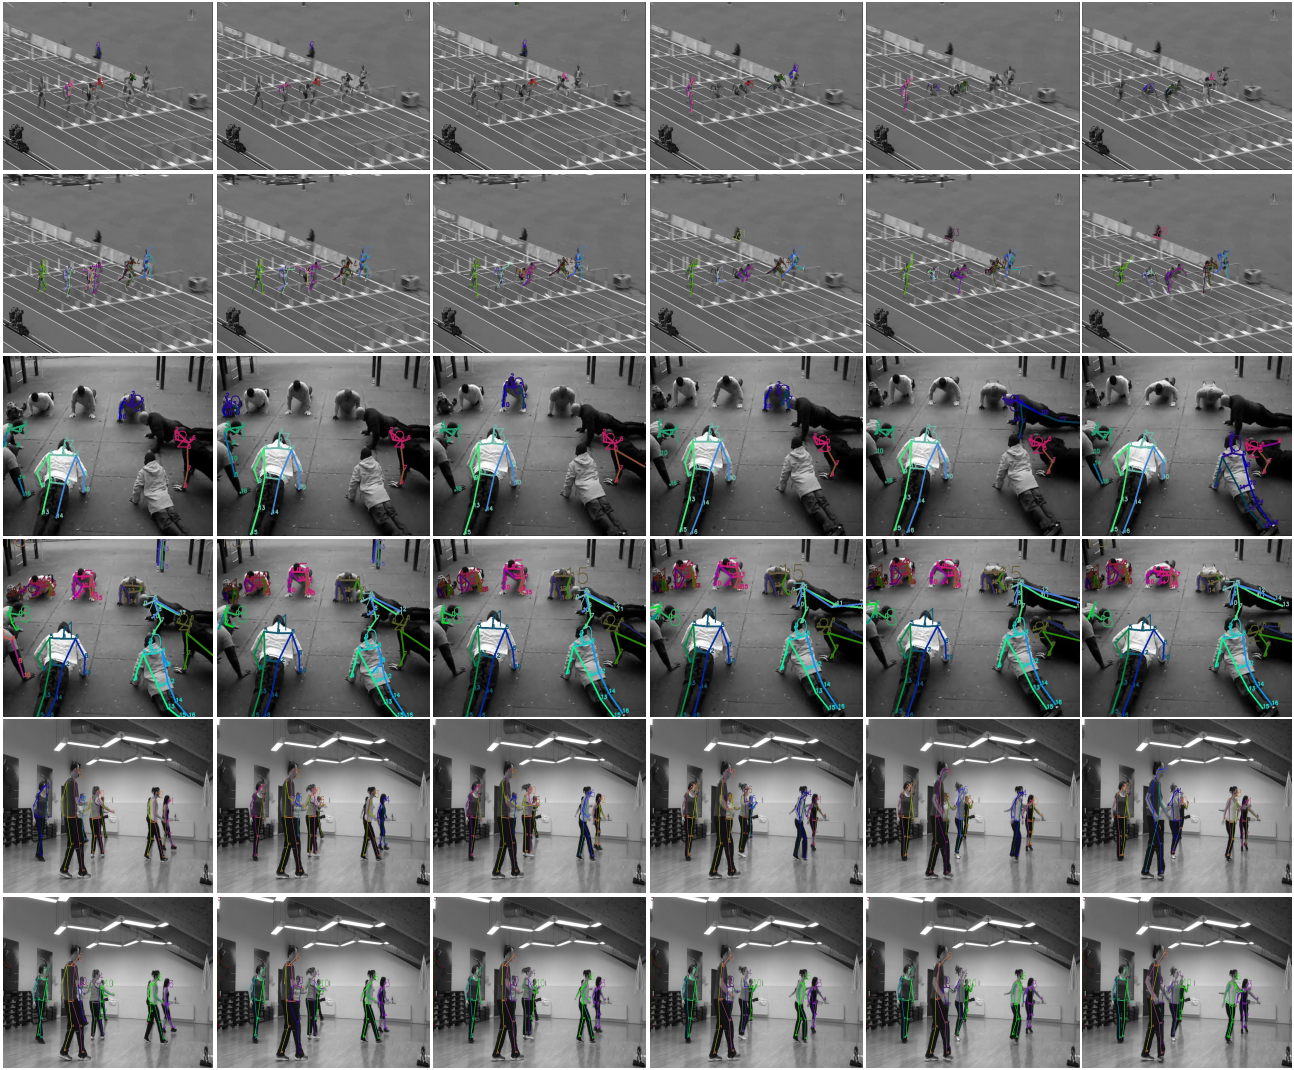

Suppl. Fig. 1. Difference between unfiltered (top of each pair) and filtered (bottom of each pair) sequences for LightTrack (top), STAF (middle) and Openpose (bottom). We can see clearly how for LightTrack and STAF, the filtering allows more joints to be tracked throughout several frames, allowing the poses to reach the required number of keypoints to be considered a valid skeleton. For Openpose, the poses are all identified, but the ID of each person is not kept constant, which is fixed by filtering.
